# Supplementary material for: PyuARF16/33 Are Involved in the Regulation of Lignin Synthesis and Rapid Growth in Populus yunnanensis
Source: MDPI journal article supplement (doi:10.3390/genes14020278), 2023-01-21

**Table S1** The gene-specific primers for RT-qPCR used in this study

| Gene name        | Forward Primer(5' to 3') | Reverse Primer(5' to 3')  |
|------------------|--------------------------|---------------------------|
| <i>PyunARF33</i> | GATGCAGCAGAGGCTAGATCC    | AGCTGCAACAGTGGATTGGG      |
| <i>PyunARF5</i>  | TGCAGCAGCGCATTTCAGTAT    | CGCCTGCAAAGATGGAGAGT      |
| <i>PyunARF27</i> | GGGAACCTCGTGACAAGCC      | CAGCTGCTCTACTTGGCCC       |
| <i>PyunARF35</i> | TTGTCAGAAATGGCTGGTCAC    | AGCTAAAGAGTGTACACGGCA     |
| <i>PyunARF18</i> | CCAGCAGCAGCAGAATCAAC     | CTGTCCAAGTTGACCAGCCT      |
| <i>PyunARF21</i> | GGAGTCCGCAGATACATGGG     | CCTGGCTGCTTAGGGAACCTT     |
| <i>PyunARF3</i>  | GAGCTCCTCAATGCATGGTG     | GTTGATCAGTGCCACCATCC      |
| <i>PyunARF4</i>  | TGCAACCACCATCTCAGGAGC    | GCCTCACACCCACCATCAAG<br>T |
| <i>PyunARF16</i> | TCGAGGACAACCCAAGAGG      | AGGCATGAAAGTTTGAAGAC<br>G |
| <i>PyunARF13</i> | TTCTCTGTTCTCGTCGTGC      | ACAAACACACTCCAACCCGT      |
| <i>PyunARF17</i> | CAATGCAACCGCCAACTCAG     | GCCTCACACCCACCATTAAC<br>T |
| <i>PyunARF34</i> | TATGGTGGTACCGCACAAGA     | TGATTCTGGTTGGTCCAGGC      |
| <i>HIS</i>       | TTTAAGACTGATCTGCGTTTCC   | GAACAGCCCAACAAGGTATG      |

**Table S2** The proportion of Gln(Q),Ser(S),Leu(L),Pro(P) and Thr(T) in MR domain of *PyuARFs* gene. The proportion of Gln (Q), Ser (S), Leu (L), Pro (P), Thr (T) determines whether the MR Domain of ARFs has transcriptional activation or inhibition.**>PyuARF17/207-279**

NR SPFT I FY N PRAD FV I P LI K FR KA VFGQV SVGMR F G M M FETE E  
S GKRRY M GTI V G IS DDP L RWPGS K WR N LQ

Gln (Q) 2 2.7%

Ser (S) 5 6.8%

Leu (L) 3 4.1%

Pro (P) 5 6.8%

Thr (T) 3 4.1%

**>PyuARF4/207-279**

NRSSFTIFYNPRADFVIPLIKFRKTVFGQVSVGMRFGMMFETEESAK RRY  
M GTI V G NS DDP L RWPGS K WR N LQ

Gln (Q) 2 2.7%

Ser (S) 6 8.2%

Leu (L) 3 4.1%

Pro (P) 4 5.5%

Thr (T) 4 5.5%

**>PyuARF21/207-279**

NNSPFTIFYNPRAEFVIPFSKYNKALYTQVSLGMRFRMMFETEESGV RRY  
M GTI T G IS DDPVRW KN S Q WR N LQ

Gln (Q) 3 4.1%

Ser (S) 6 8.2%

Leu (L) 3 4.1%

Pro (P) 4 5.5%

Thr (T) 5 6.8%

>PyuARF34/207-279

NN SPFT I FY N PSA EFV I P FS K YN KAM YTQG S L GMRF R M M F T TE  
E S G V R R Y M G T I T G I S D D P V R W K N S Q W R N L Q

Gln (Q) 3 4.1%

Ser (S) 7 9.6%

Leu (L) 2 2.7%

Pro (P) 4 5.5%

Thr (T) 6 8.2%

>PyuARF18/207-279

NN SPFT V F Y N P R A E F V I P L A K Y Y K A V Y S Q I S L G M R F R M M F E T E E  
S G T R R Y M G T I T G I S D D P A R W K N S Q W R N L Q

Gln (Q) 3 4.1%

Ser (S) 6 8.2%

Leu (L) 3 4.1%

Pro (P) 4 5.5%

Thr (T) 5 6.8%

>PyuARF35/207-279

N N S P F T V Y Y N P R A E F V I P L A K Y Y K A V Y S Q I S L G M R F R M M F E T E E S G T R R  
H M G T I T G I S D D A V R W K N S Q W R N L Q

Gln (Q) 3 4.1%

Ser (S) 6 8.2%

Leu (L) 3 4.1%

Pro (P) 3 4.1%

Thr (T) 5 6.8%

>PyuARF13/165-235

P A Q E L I A R D L H D V E W K F R H I F R G Q P K R H L L T T G W S V F V S A K R L V A G D S V  
L F I W N E K N Q L L L G I R R A T R P Q T

Gln (Q) 4 5.6%

Ser (S) 3 4.2%

Leu (L) 9 12.7%

Pro (P) 3 4.2%

Thr (T) 4 5.6%

>PyuARF33/207-279

T N S C F T V F Y N P R A E F V I P L S K Y V K A V F H R I S V G M R F R M L F E T E E  
S S V R R Y M G T I T G T S D D P V R W P N S H W R S V K

Gln (Q) 0 0.0%

Ser (S) 8 11.0%

Leu (L) 2 2.7%

Pro (P) 4 5.5%

**Thr (T) 6 8.2%**  
**>PyuARF3/207-279**  
**T N S R F T I F Y N P R A E F V I P L A K Y L K A V Y Y R V S V G M R F R M M F E T E**  
**E S S V R R Y M G T I T G I S D D V V R W P N S Q W R S V K**  
**Gln (Q) 1 1.4%**  
**Ser (S) 7 9.6%**  
**Leu (L) 2 2.7%**  
**Pro (P) 3 4.1%**  
**Thr (T) 5 6.8%**  
**>PyuARF27/207-279**  
**T N S R F T I F Y N P R A E F V I P L A K Y L K A V Y Y R V S V G M R F R M L F E T E E**  
**S S V R R Y M G T I T G I S D D V A R W P N S L W R S V K**  
**Gln (Q) 0 0.0%**  
**Ser (S) 7 9.6%**  
**Leu (L) 4 5.5%**  
**Pro (P) 3 4.1%**  
**Thr (T) 5 6.8%**  
**>PyuARF16/207-279**  
**T N S R F T I F Y N P R A E F V I P L V K Y I K A V Y H R V S V G M R F R M L F E T E E**  
**S S V R R Y M G T I T G I S D D P V R W P N S H W R S V K**  
**Gln (Q) 0 0.0%**  
**Ser (S) 7 9.6%**  
**Leu (L) 2 2.7%**  
**Pro (P) 4 5.5%**  
**Thr (T) 5 6.8%**  
**>PyuARF5/207-279**  
**T N S R F T I F Y N P R T E F V I P L V K Y I K A V Y H R V S V G M R F R M L F E T E E**  
**S S V R R Y M G T I T G I S D D P A R W P N S H W R S V K**  
**Gln (Q) 0 0.0%**  
**Ser (S) 7 9.6%**  
**Leu (L) 2 2.7%**  
**Pro (P) 4 5.5%**  
**Thr (T) 6 8.2%**

**Figure S1** Sequence alignment and corresponding domain of *PyuARFs*. ARFs has three main domains: B3, MR And AUX/IAA

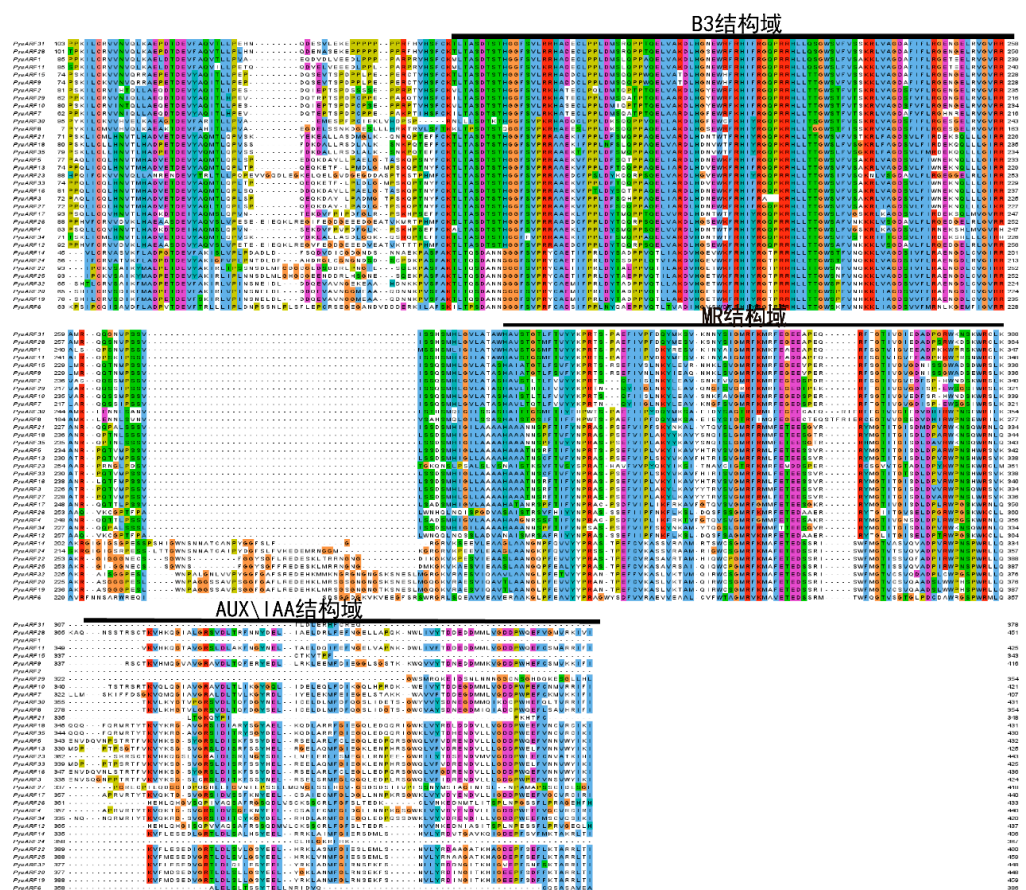

**Figure S2** The number and types of Motifs of *PyuARFs*.

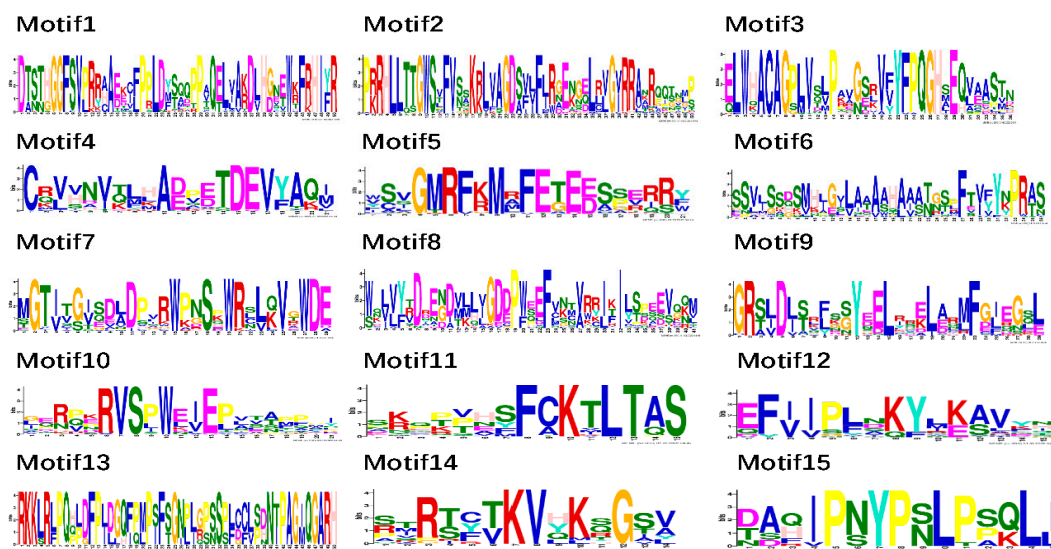

Supplement: s1 [file s1]
